# Supplementary material for: Uncovering and tailoring hidden Rashba spin–orbit splitting in centrosymmetric crystals
Source: Springer Nature journal article supplement (doi:10.1038/s41467-019-08836-4), 2019-02-22
Supplement: MOESM1 [file 41467_2019_8836_moesm1_esm_694_1.pdf]

## Supplementary Information

At room temperature,  $\beta$ -SnTe has the centrosymmetric rocksalt (space group Fm-3m) structure<sup>1</sup> (Supplementary Figure 1a) and, as temperature is lowered,<sup>2</sup> it undergoes a (ferroelectric) phase transition to the non-centrosymmetric rhombohedral (space group R3m) R-1 structure,<sup>3,4</sup> where the Te atom is spontaneously displaced along the [111] direction relative to Sn atom. We focus on the bands near Fermi energy around the Z point which exhibits the most pronounced Rashba spin splitting (Supplementary Figure 1b).

In the centrosymmetric rocksalt phase (illustrated by dashed lines in

Crystal structure of centrosymmetric  $\alpha$ -SnTe identify with two inversion sectors (pink domain) and (cyan domain). The centrosymmetric phase transfers to a non-centrosymmetric rhombohedral phase as the Te atom displaced from Sn along [111] direction Band structure around the time-reversal invariant momentum





The rotation symmetry of these eight symmetry operators forms the little group  $D_{2h}$  of the  $\bar{\Gamma}$ -point. The character table of  $D_{2h}$  is given in Supplementary Table 1. Note that  $\text{BaNiS}_2$  as a non-magnetic crystal also contains the time reversal symmetry  $\hat{T}$ .

The distinct band topology along  $\bar{\Gamma}-\bar{X}$  and  $\bar{\Gamma}-\bar{M}$  of the monolayer  $\text{BaNiS}_2$  without SOC shown in Figure 1c can be understood from the effective model Hamiltonian. Since the Rashba bands of our interest around the  $\bar{\Gamma}$ -point are mainly derived from the Ni  $d$ -orbitals with  $d_{xy}$  and  $d_{yz}$  character, the atomic  $d$  states of Ni atom  $|d_{xy}\rangle$ ,  $|d_{yz}\rangle$ , where  $d$  denotes a hybridization state of  $d_{xy}$  and  $d_{yz}$ , are the reasonable choice as the basis of the invariant expansion. The Bloch basis  $|k\rangle$  can be explicitly expressed as a Bloch sum of the local  $d$  states,

$$|k\rangle = \frac{1}{\sqrt{N}} \sum_{\mathbf{r}} e^{i\mathbf{k}\cdot\mathbf{r}} |d_{\mathbf{r}}\rangle$$

— — direction, obtaining forbidden interaction between degenerate states segregated on two inversion-partner sectors and leading to the two-fold degeneracy of the energy bands in agreement with the first-principles calculation,
